# Supplementary material for: More Than 1,001 Problems with Protein Domain Databases: Transmembrane Regions, Signal Peptides and the Issue of Sequence Homology
Source: PLoS Comput Biol. 2010 Jul 29;6(7):e1000867. doi: 10.1371/journal.pcbi.1000867 (PMC2912341; doi:10.1371/journal.pcbi.1000867)
Supplement: Figure S2 — False-positive hit of PF00497 in Alt a 1. (0.01 MB PDF) [file pcbi.1000867.s002.pdf]

**Supplementary Figure S2**

**Fragment-mode HMMER2 hits of the SBP\_bac\_3 (PF00497) domain model into the “Alt a I” sequence**

```
>gi|1773369|gb|AAB40400.1| Alt a I subunit [Alternaria alternata]

MQFTTIASLFAAAGLAAAAPLESRQDTASCPVTTEGDYVWKISEFYGRKPEGTYYNLSLGFNIKATNGGTLDFTCSAQADKLEDHKWYSCGENSFMDFSFD
SDRSGLLLKQKVSDDDITYVATATLPNYCRAGGNGPKDFVC
QGVADAYITLVTLPKSS

HMMER 2.1.1 (Dec 1998)

Query:  gi|1773369|gb|AAB40400.1|  Alt a I subunit [Alternaria alternata]

SBP_bac_3      Bacterial extracellular solute-binding      7.0      0.072      1
SBP_bac_3      1/1      1      38 [.      1      60 [.      7.0      0.072

SBP_bac_3: domain 1 of 1, from 1 to 38: score 7.0, E = 0.072

      *->MKklllagiWilllalallaalalagsgaaaaaldkeddtldlwekIk
      M+++++a      +l  +++a la+a+++++ +++
gi|1773369      1      MQFTTIA-----SL--FAAAGLAAAAPLESRQDT----- 27

      kkgvlrvaTegtY<-*
      ++  v+Teg+Y
gi|1773369      28 --ASCPVTTEGDY      38
```
