# Supplementary material for: More Than 1,001 Problems with Protein Domain Databases: Transmembrane Regions, Signal Peptides and the Issue of Sequence Homology
Source: PubMed Central journal article supplement (PMC2912341; doi:10.1371/journal.pcbi.1000867), 2010-07-29
Supplement: pcbi.1000867.s001.pdf [file pcbi.1000867.s001.pdf]

# Supplementary Figure S1

## Fragment-mode HMMER2 hits of the Acetyltransf domain model into Eco1 homologous sequences

>ECO1A\_ORYZA\_SATIVA GI|5702976|GB|AQ794507.1|AQ794507.[91:444].SP.TR GENEWISE TRANSLATIONVYLFISSQRIVGCLVVEPIKTAHKVIPGSTEENGKYRDPGAIICEKEDVPAHCGFRAIWV VPSRRRKRIGSQLMDAAR

HMMER 2.1.1 (Dec 1998)

Query: ECO1A\_ORYZA\_SATIVA GI|5702976|GB|AQ794507.1|AQ794507.[91:444].SP.TR GENEWISE TRANSLATION

Acetyltransf Acetyltransferase (GNAT) family 13.5 0.0017 1  
 Acetyltransf 1/1 2 77 .. 1 46 [. 13.5 0.0017

Acetyltransf: domain 1 of 1, from 2 to 77: score 13.5, E = 0.0017

```

      *->lvaeedgelvGfaglspe.....
          ++ ++vG+ + pi ++ ++++++++ +++++ +++++
ECO1A_ORYZ 2 YLFISSQRIVGCLVVEPIKTAHKVIPGSTEENGKYRDPGAIICEKED 48

      ...vaeieglavDpeyRgkGiGtaLleal<-*
          + ++ +++V p+ R+k iG++L++a+
ECO1A_ORYZ 49 vpaHCGFRAIWVPSRRRKRIGSQLMDAA 77
  
```

>ECO1\_CA ORF6.3383.PROT ORF6-2238:8014-8796:E 783 BP, 260 AA, CONTIG 17099 BP [CANDIDA ALBICANS] MGSINSQKPKIQSILALPSNFKKITCSTCDMTYNPHISQDKLLHNKYHTNFINGIPWNYKTDNDVLIENFTLVETPKLNSTGKSLKSTKTRQTFKGSICINKSNKRHIQKVELLLNMVNQELNASQDSGQWKKPEFDRSKAFVIIIDSKAIGLCTDTTIQPDQGRWMIHKTQSIVPNQINKNVVIGISRIWISRKWRQYGLGKLLNVVLKNSIYSVQLLKNQVAFSQPSFSGGMLAKSFNGVKHKSGEMLLPVYIE

HMMER 2.1.1 (Dec 1998)

Query: ECO1\_CA ORF6.3383.PROT ORF6-2238:8014-8796:E 783 BP, 260 AA, CONTIG 17099 BP [CANDIDA ALBICANS]

Acetyltransf Acetyltransferase (GNAT) family 11.4 0.009 1  
 Acetyltransf 1/1 145 214 .. 1 48 [. 11.4 0.009  
 ECO1\_CA 37 HISQDKLLHNKYHTNFINGI 56

Acetyltransf: domain 1 of 1, from 145 to 214: score 11.4, E = 0.009

```

      *->lvaeedgelvGfaglspe.....vaeie
          +v+ +d + +G ++ i+++++++ +++++ + + + v+ i
ECO1_CA 145 FVIIIDSKAIGLCTDTTIQPDqgrwmihktqsivpnqinknvVIGIS 191

      glaVdpeyRgkGiGtaLlealee<-*
          ++++++ +R G+G++Ll+ + + +
ECO1_CA 192 RIWISRKWRQYGLGKLLNVVLK 214
  
```

>ECO1\_CIONA\_INTESTINALIS GI\_1 NORI SATOH UNPUBLISHED CDNA LIBRARY CIONA INTESTINALIS CDNA CLONE RCITB3J17 3'

HDQHQLHKLHHQRFNVILRFPSSWKNERTVASYVDGRIVKILPTDPKFAQKKVEDILELIDSELGFSQNISTTRVSYLYVSDQQQVTGCLIAEQIKRGFPLL ETMTSSGMMSCSLQSTPVTCGVSRIWCHAPHRKRGVATRLMDALRCSFVLGERLNMNQVAFSDPTISGKSFATKYFKTPH FLTYNCST

HMMER 2.1.1 (Dec 1998)

Query: ECO1\_CIONA\_INTESTINALIS GI\_1 NORI SATOH UNPUBLISHED CDNA LIBRARY CIONA INTESTINALIS CDNA CLONE RCITB3J17 3'

Acetyltransf Acetyltransferase (GNAT) family 11.9 0.0064 1
Acetyltransf 1/1 107 144 .. 11 46 .. 11.9 0.0064

Acetyltransf: domain 1 of 1, from 107 to 144: score 11.9, E = 0.0064

\*->Gfaglsptide..vaeieglaVdpeyRgkGiGtaLleal<-\*

G++++s + ++ + +++ + +R++G++t+L++al

ECO1\_CIONA 107 GMMSCSLQSTpvTCGVSRWCHAPHRKRGVATRLMDAL 144

>ECO1\_DM GI|7295257|GB|AAF50579.1| (AE003559) CG8598 GENE PRODUCT [DROSOPHILA MELANOGASTER]
METPTGSGRPSRMPRLSERKRQLFGSPRSRLRQINDEDDADVDSLGLVPLKTHVAANRKRSLFAAVPGKSSSSANSSPETNKENKTRGGVMTATA
EQLPQLFTATMRLNSNSSSRNSSPRQTRVQRKRADSSMSPTSSSEGTSSRRARNSIRRSPTFSAQKDPDAFSSPESFQTRLSKVAAMLKMGQDSRS
MLEKSKKKHNSLKTAAQVHTTKPKKTSPEAESQSDDEKPSKSKNSRKNTEVRETRSSQIISPKTRNRRRPFSTADINCKTLKAAHLHENMRSYDEEKT
AAVKLENSRSLRSPVVEVFKSNDDAVKRNTGNTNNKTAKSSEVATAKRPESPGSSMKIDVEVPESEDEASNHKPQKRQHPETSTPVAPADADSGSPQSK
MRKVTLSSTIPTMAFYSHSGEAVTKSRRRPSISKNSLQKPTKISPTSRPLLKINKGVHKKIRKRHGFANRLPATMDNINLSLNERLKNLITTKREERA
KVEEVHQILRNAKDPKMAKPLSVIEADDANNNNLPTAWQETSADFSDLSDVEDIDPIIEVEPIPIIRHEPVQKSPTAEPADLSKRKFFKSGRRSST
CMEVITDNIRASVSQKGIELVQTIRRKPRQVRVKSATIFSAEQATVDAILKNLDDTVVDEIVEANPVVQATPIDAETTMTETESLPDIEYAPEANDVE
IDPFAEFRQLRPYQTDVDPNVVEQQQILLEFLISNNICTEKNFEIFIANPDDYKDEANQIVDNLYMVVNSEEAQAQMETVENTAVAIAPKQDAPAVEEV
QPKLFPIFTQRLQPVVQKSLRRRPTSMRLTLAAGGSNQYQIDAGQKAFGARQCQCGLVYTVHEPEEELLHREYHNSIHVLRFKGWIDEDIVSVYPEWA
SDGRIIRINERAPTARLDRLDLIGVVDKELGYSSYIVPKIFVAFIAVRKQIVGFCVLVQPLSQAHRFIQVDGTDYFSEESYPASCVSRIRWVSPQRSS
GIASKLLRVVQCHTIVLQGEIARECIAFSTPTDDGRALARQFTGLDNFLTYDQ

HMMER 2.1.1 (Dec 1998)

Query: ECO1\_DM GI|7295257|GB|AAF50579.1| (AE003559) CG8598 GENE PRODUCT [DROSOPHILA MELANOGASTER]

Acetyltransf Acetyltransferase (GNAT) family 17.5 6.4e-05 1
Acetyltransf 1/1 945 1008 .. 1 44 [. 17.5 6.4e-05

Acetyltransf: domain 1 of 1, from 945 to 1008: score 17.5, E = 6.4e-05

\*->lvaeedgelvGfaglsptide.....vaeiegl

+++ ++ ++vGf+ + p + ++ + ++++ +++++ + + + ++

ECO1\_DM 945 FIAVRKQIVGFCVLVQPLSQahrfiqvdtgdyfseesypaSCVSRIR 991

aVdpeyRgkGiGtaLleal<-\*

+V+p R+ Gi+++Ll+

ECO1\_DM 992 WVSPLQRRSGIASKLLR 1008

>ECO1\_SC GI|6321140|REF|NP\_011218.1| INVOLVED IN ESTABLISHMENT OF COHESION BETWEEN SISTER
CHROMATIDS; ECO1P#GI|1176006|SP|P43605|YFJ7\_YEAST HYPOTHETICAL 31.8 KD PROTEIN IN HIS2-CDC14
INTERGENIC REGION#GI|1084747|PIR|S56282 HYPOTHETICAL PROTEIN YFR027W - YEAST (SACCHAROMYCES
CEREVISIAE)#GI|836782|DBJ|BAA09266.1| (D50617) YFR027W [SACCHAROMYCES
CEREVISIAE)#GI|893422|DBJ|BAA08038.1| (D44602) UNKNOWN [SACCHAROMYCES CEREVISIAE]

MKARKSQRKAGSKPNLIQSKLQVNNNGSKSNKIVKCDKCEMSYSSTSIEDRAIHEKYHTLQLHGRKWSPNWGSIVYTERNHSRTVHLSRSTGTITPLNSP
LKKSSPSITHQEIKIVYVRPDKSNGEVAMTEIMTLVNNELNAPHDENVIWNSTTEEKGFVYIRNDRAVGIIEENLYGGNGKTSRGRWVYDSRRL
VQNVYPDFKIGISRIWVCRTRAKLGIATKLIDVARENIVYGEVPIPRVQVAWSQPTDSGGKGLASKYNGIMHKSGLKLLLPVYI

HMMER 2.1.1 (Dec 1998)

Query: ECO1\_SC GI|6321140|REF|NP\_011218.1| INVOLVED IN ESTABLISHMENT OF COHESION BETWEEN SISTER
CHROMATIDS; ECO1P#GI|1176006|SP|P43605|YFJ7\_YE

Acetyltransf Acetyltransferase (GNAT) family 13.9 0.0012 1

Acetyltransf 1/1 162 236 .. 1 48 [. 13.9 0.0012

Acetyltransf: domain 1 of 1, from 162 to 236: score 13.9, E = 0.0012

\*->lvaeedgelvGfaglsptide.....

+v+ ++++ vG + + ++++++++ +++++ ++ ++

EC01\_SC 162 FVYIRNDRAVGIIIIENLYGngktsrgrwmvydsrrlvqnvypdf 208

vaeieglavDpeyRgkGiGtaLlealee<\*

+ i +++V + +R+ Gi+t+L++ + e

EC01\_SC 209 KIGISRIWVCRTARKLGIATKLIDVARE 236

>EC01\_SP GI|7490455|PIR||T39541 DNA DAMAGE INDUCIBLE PROTEIN HOMOLOG - FISSION YEAST (SCHIZOSACCHAROMYCES POMBE)#GI|2842510|EMB|CAA16862.1| (AL021748) SIMILAR TO DNA-DAMAGE-INDUCIBLE PROTEIN [SCHIZOSACCHAROMYCES POMBE]#GI|7678718|DBJ|BAA95122.1| (AB039861) ES01 [SCHIZOSACCHAROMYCES POMBE]

MELGKSKFSWKDLQYCDKAGTQNSPLRVVAHIDQDAFYAQVESVRLGLDHSVPLAVQQWQGLIAVNYAARAANISRHETVTEAKKKCPCLCTAHVKTWKA GESEAKYHENPNPNYKTCCLDPYRHEsvkILNI IKKHAPVVKKASIDECFIELTSVKRIVLEEYPYLKIPSEDSNVALPQAPVLLWPAEFGMVEEEVV DRTKEDYERDWDVFLFYAAKIVKEIRDDIYLQLKYTCSAGVSFNPMLSKLVSSRNKPNKQITLTKNAIQDYLVSLKITDIRMLGGKFGEIINLLGTDSD IKDVWNMSMDFLIDKLGQTNGLVWNLCHGIDNTEITTVQVQIKSMLSAKNFSQQKVKSEEDA INWFQVFASDLRSRFLLELEGMRRPKTICLTVVSRFLRK SRSSQIPMNVDISTQFIVEATSKLLRQLQEQEFDVYPI SNLSISFQNI IEVDRNSRGIEGFLKKSNDIYMSTSVSPSIEGRAKLLNENMRENSFELSSE KDIKSPKRLKRGKGGIFDMLQQTAVSKPTENSADETYTCECEQKITLSERNEHEDYHIALSISRKERYNNLVPPSHDKPKQVKPKTYGRKTGSKHYAP LsDETNNKRAFLDAFLNGGGLTPNWKKQTPKAISSSDNMTQLHLDLANSTVTCSECSMEYNSTSEEDILLHSRFRHSRVLGGVTVSFQCSPIYRVNYGL SSDCIYSINSESLIDQRKAEALS FVNNELSSSEPIETIGVDKYTTFLFISDKKCVGLLLAERISSAYIVDELELNNNNSTSSAVYIKNENLTKGFLGLGI SRIWVSASRRKQGIASLLLDNALKKFIYGYVISPAEVAFAFSQPSSESGQFIISWHRSRNNGSSKSRYAVYES

HMMER 2.1.1 (Dec 1998)

Query: EC01\_SP GI|7490455|PIR||T39541 DNA DAMAGE INDUCIBLE PROTEIN HOMOLOG - FISSION YEAST (SCHIZOSACCHAROMYCES POMBE)#GI|2842510|EMB|CAA16862

Acetyltransf Acetyltransferase (GNAT) family 9.9 0.03 1

Acetyltransf 1/1 784 825 .. 13 49 .. 9.9 0.03

>EC01\_YARROWIA\_LIPOLYTICA GI\_1 T7 END OF CLONE AW0AA013E09 OF LIBRARY AW0AA FROM STRAIN CLIB 89 OF YARROWIA LIPOLYTICA, GENOMIC SURVEY SEQUENCE

MKTYRAKRKYLSESEDDVFSSTPQSPETSPLQPPNESRLNIKAAQAVSPCQKRAKVVKKPAKTKAPVQMTLSLQTTSTTCKTCGMTYQVAYGPDISAH KSFHSTALNGPKWPKPSVAVVVDKSKTYTVYKSRLLSHPCVSQFLKLVNSELNAPELILSSQAAYVYVVDQRAVGCVLVDRITKCRHVDIQTGLGLKE YPAVMGVSVMYVSQLFRRTGIVTKLLDLAKSDFIYGIGA

HMMER 2.1.1 (Dec 1998)

Query: EC01\_YARROWIA\_LIPOLYTICA GI\_1 T7 END OF CLONE AW0AA013E09 OF LIBRARY AW0AA FROM STRAIN CLIB 89 OF YARROWIA LIPOLYTICA, GENOMIC SURVEY SEQUENCE

Acetyltransf Acetyltransferase (GNAT) family 12.7 0.0032 1

Acetyltransf 1/1 166 229 .. 1 46 [. 12.7 0.0032

Acetyltransf: domain 1 of 1, from 166 to 229: score 12.7, E = 0.0032

\*->lvaeedgelvGfaglsptide.....vaeieglav

+v+ +d + vG++ + i ++ + +++ + ++ + v + +++V

ECO1\_YARRO 166 YVYVVDQRAVGCVLVDRIKcrhvdiqtgtlglkeypaVMGVSRMYV 212

dpeyRgkGiGtaLleal<-\*

+ +R+ Gi t+Ll+ +

ECO1\_YARRO 213 SQLFRRTGIVTKLLDLA 229

## Supplementary Figure 1B

### Fragment-mode HMMER2 hits of the SBP\_bac\_3 (PF00497) domain model into the "Alt a I" sequence

>gi|1773369|gb|AAB40400.1| Alt a I subunit [Alternaria alternata]

MQFTTIA SLFAAAGLAAAAPLESRQDTASCPVTTEGDYVWKISEFYGRKPEGTYYNLSLGFNIKATNGGTLDFTCQAQADKLEDHKWYSCGENSFMDFSFD  
SDRSGLLLKQKVSDDITYVATATLPNYCRAGGNGPKDFVC  
QGVADAYITLVTLPKSS

HMMER 2.1.1 (Dec 1998)

Query: gi|1773369|gb|AAB40400.1| Alt a I subunit [Alternaria alternata]

|           |                                        |     |         |                 |
|-----------|----------------------------------------|-----|---------|-----------------|
| SBP_bac_3 | Bacterial extracellular solute-binding | 7.0 | 0.072   | 1               |
| SBP_bac_3 | 1/1                                    | 1   | 38 [. 1 | 60 [. 7.0 0.072 |

SBP\_bac\_3: domain 1 of 1, from 1 to 38: score 7.0, E = 0.072

\*->MKklllagiWilllalallaalalagsgaaaaaldkeddtlwekIk

M++++a +l +++a la+a++++ +

gi|1773369 1 MQFTTIA-----SL--FAAAGLAAAAPLESRQDT----- 27

kkgvlrvaTegtY<-\*

++ v+Teg+Y

gi|1773369 28 --ASCPVTTEGDY 38
